# Supplementary material
Source: MDPI journal article supplement (https://www.mdpi.com/1996-1073/12/17/3254)
Supplement: s1 [file s1]

Table S1. Cataloging Relevant Information

| Reference | Purpose                   | Application                          | Data type | Forecast Models | Forecasting technique(s)                          | Time Horizon    | Target Variable                                 | Performance                                                                                                          | Performance (metric) |
|-----------|---------------------------|--------------------------------------|-----------|-----------------|---------------------------------------------------|-----------------|-------------------------------------------------|----------------------------------------------------------------------------------------------------------------------|----------------------|
| [43]      | Demand side management    | Commercial (Building complex)        | Real data | Blackbox        | ANN-MLP                                           | 1 day           | Building electricity consumption                | Static 8.44–11.16%<br>Accumulative 7.97–9.91%<br>Sliding window 8.74–9.62%                                           | CV%                  |
| [44]      | Planning and optimization | Institutional (College campus)       | Real data | Blackbox        | ANN-NARX                                          | 24 hr           | Heating load<br>Cooling load<br>Electrical load | Cooling–0.964; Heating–0.986; Electrical–0.933                                                                       | R <sup>2</sup>       |
| [45]      | Demand side management    | Institutional (University buildings) | Real data | Blackbox        | ANN-MLP                                           | Daily - 22 days | Daily energy consumption                        | 0.9852 to 0.9694                                                                                                     | R <sup>2</sup>       |
| [46]      | N/s                       | Institutional (University buildings) | Real data | Blackbox        | Polynomial<br>Exponential Mixed<br>AR ANN-N/s SVM | 2 day to 6 days | Overall electricity consumption                 | Polynomial-7.43–13.86%;<br>Exponential-18%; Mixed-7.59–23%;<br>AR-5.3–8.72%; ANN -N/s-7.89–12.55%;<br>SVM-5.79–9.28% | MAPE                 |
| [47]      | Energy management         | Institutional (University building)  | Real data | Blackbox        | ANN-NARX                                          | 1 min<br>1 hr   | Overall electricity demand                      | 1 minute: 1–3.16%; 1 hour -5.49–33.29%                                                                               | CV%                  |
| [48]      | Energy management         | District                             | Real data | Blackbox        | ANN-Recurrent<br>ANN-RBF-NARMA<br>ANN-FFNN        | 24 hr           | Cooling load                                    | ANN-Recurrent $3.22 \times 10^{-3}$<br>ANN-RBF-NARMA $1.69 \times 10^{-3}$<br>ANN-FFNN $1.12 \times 10^{-3}$         | MSE                  |

|      |                                   |                                               |                     |                          |                                          |               |                                                               |                                                                                                                                                     |                |
|------|-----------------------------------|-----------------------------------------------|---------------------|--------------------------|------------------------------------------|---------------|---------------------------------------------------------------|-----------------------------------------------------------------------------------------------------------------------------------------------------|----------------|
| [49] | Optimizing thermal energy storage | Commercial (Office buildings)                 | Simulated (ESP-r)   | Blackbox                 | ANN-GRNN                                 | 1 hr          | Cooling load                                                  | 0.89–0.96                                                                                                                                           | R <sup>2</sup> |
| [50] | N/s                               | ASHRAE shootout Commercial (Office buildings) | Real data           | Blackbox                 | ANN-MLP                                  | 1 hr<br>24 hr | Cooling load                                                  | ASHRAE 8.98 to 11.4%; Office 1 hr-2.39–3.02%; 24 hr-5.47 to 12.58%                                                                                  | CV%            |
| [51] | Building energy management        | ASHRAE shootout PROBE N benchmark             | Benchmark           | Blackbox                 | ANN-Feedback                             | 1 hr          | Energy consumption                                            | ASHRAE 1.44% PROBEN (Real data) 2.55%                                                                                                               | CV%            |
| [52] | Demand side management            | Institutional (University campus)             | Real data Benchmark | Blackbox                 | AR model<br>Polynomial<br>ANN-N/S<br>SVM | 1-6 day       | Electricity consumption<br><br>ASHRAE data<br>EUNITE data set | 1day 1–6 days<br>AR: 5.74–13.78%; 7.35-10.97%;<br>SVM: 5.88-14.25%; 7.92-11.58%; Poly: 6.94–19.78%<br>11.91–15.75%<br>ANN: 6.63–17.64% 10.97–17.11% | MAPE (%)       |
| [53] | Demand side management            | Institutional (University campus)             | Real data           | Blackbox                 | ANN-MLP                                  | 1 day         | Overall electricity usage                                     | 2.59–5.42%                                                                                                                                          | MAPE (%)       |
| [54] | Demand side management            | Commercial (Shopping centers)                 | Real data           | Blackbox                 | MA<br>LR<br>PLR<br>ANN-N/S               | 1 day         | Overall electricity usage                                     | ANN-N/s-11.06%; MA-25.4%; Linear Regression-17.96%; Piecewise linear regression-21.65%                                                              | MAPE (%)       |
| [55] | Building energy management        | Institutional (Hospital)                      | Real data           | Blackbox                 | ANN-BPNN                                 | Daily         | Overall electricity usage                                     | 6.97 to 11.15%                                                                                                                                      | MAPE (%)       |
| [56] | N/s                               | Commercial (Center)                           | Real data           | Blackbox Hybrid-ensemble | MLR ARIMA SVM<br>DT (RF) ANN-MLP         | Daily         | Overall energy consumption                                    | Consumption Peak<br>MLR-4.23– 6.08%;<br>ARIMA-5.45– 8.74%;                                                                                          | MAPE (%)       |

|      |                                   |                                                |                        |                      |                               |        |                                                              |                                                                                                                                                                     |                    |
|------|-----------------------------------|------------------------------------------------|------------------------|----------------------|-------------------------------|--------|--------------------------------------------------------------|---------------------------------------------------------------------------------------------------------------------------------------------------------------------|--------------------|
|      |                                   |                                                |                        |                      | MARS Knn Ensemble             |        | (kWh) Peak demand (kW)                                       | SVM-3.11–3.34%; DT (RF)-3.17–3.63%; ANN-MLP-4.75– 6.46%; MARS -4.07– 5.94%; kNN-4.01– 5.77%; Ensemble-2.32– 2.85%                                                   |                    |
| [57] | Optimizing thermal energy use     | Commercial (Office)                            | Real data              | Blackbox             | ELM MLR ANN-BPNN SVR          | 40 min | Heating load                                                 | MLR 0.11–0.14 3.86–4.28 kWh BPNN 0.13–0.14 4.10–4.26 kWh SVR 0.15–0.16 4.46–4.68 kWh ELM 0.12–0.14 3.82–4.26 kWh                                                    | MAPE<br>RMSE (kWh) |
| [58] | Energy policy and decision making | Sector (Residential)                           | Real data              | Hybrid-grey Blackbox | ANN-NAR Regression Polynomial | Annual | Electricity consumption<br>Total building energy consumption | Energy Consumption ANN-NAR-0.937 Regression-0.910 Polynomial-0.874 Grey-0.964<br>Electricity Consumption ANN-NAR-0.971 Regression-0.922 Polynomial-0.897 Grey-0.954 | R <sup>2</sup>     |
| [59] | Demand and supply management      | Commercial (Office)<br>Residential (Apartment) | Simulated (EnergyPlus) | Blackbox             | MLR<br>AR<br>ARX<br>ANN-BPNN  | 1 hr   | Heating loads<br>Cooling loads                               | Commercial Heating Cooling MLR 173–249 47.5–48.5% AR 124.6–185.9 32.4–37.6% ARX 49.6–178 8.8–34% ANN-BPNN 121.2–174.9 25.3–30.6%<br>Residential Heating Cooling     | CV%                |

|      |                                     |                                      |           |                 |                                             |                 |                                 |                                                                                                                                           |                      |
|------|-------------------------------------|--------------------------------------|-----------|-----------------|---------------------------------------------|-----------------|---------------------------------|-------------------------------------------------------------------------------------------------------------------------------------------|----------------------|
|      |                                     |                                      |           |                 |                                             |                 |                                 | MLR 58.5–70.7 17.9–25.9%<br>AR 14.7–23.7 8.3–8.6%<br>ARX 10.8–22 5.0–6.9%<br>ANN-BPNN 23–23.3<br>6.4–7.1%                                 |                      |
| [60] | Demand side management              | Institutional (University campus)    | Real data | Blackbox        | ANN-BPNN                                    | 1 hr            | Overall electricity usage       | 2.22–9.93%                                                                                                                                | MAPE (%)             |
| [61] | Demand side management              | Commercial and Industrial buildings  | Real data | Hybrid-ensemble | ANN-E-FFNN                                  | 1 day           | Electricity usage               | 3–8%                                                                                                                                      | MAPE (%)             |
| [62] | Energy demand and supply management | Institutional (University building)  | Real data | Blackbox        | AR model<br>ARIMAL<br>ANN-N/S<br>Bayesian N | 1 day<br>2 days | Overall electricity consumption | 1 day 2 days<br>AR 4.26–8.14% 7.86–13.26%<br>ARIMA 13.13–13.54%<br>13.05–14.62%<br>ANN 3.46–4.11% 9.12–14.46%<br>Bayesian 6.87–22.75% N/a | MAPE (%)             |
| [63] | Demand side management              | Institutional (University building)  | Real data | Blackbox        | ANN-MLP                                     | 4 days          | Heating demand                  | 0.61 – 085                                                                                                                                | R <sup>2</sup>       |
| [64] | Demand response                     | Commercial (Office building)         | Real data | Hybrid-grey     | ANN-NAR                                     | 1 to 6-hr       | Electric demand of supply fan   | Supply fan modulation – 5.5% (RMSE)–17.6%<br>Electric demand –1.4 kW (RMSE)– 30%                                                          | RMSE (% , kW)<br>CV% |
| [65] | Energy management                   | Institutional (University buildings) | Real data | Blackbox        | Random forest<br>ANN-FFNN<br>FIR<br>ARIMA   | 1 day           | Electricity consumption         | LIBRARY<br>Random forest 139.8–225.6%<br>ANN-FFNN 60.2 –265.4%                                                                            | MAPE (%)             |

|      |                        |                                      |           |          |                                                                                             |               |                    |                                                                                                                                                                                                                                               |          |
|------|------------------------|--------------------------------------|-----------|----------|---------------------------------------------------------------------------------------------|---------------|--------------------|-----------------------------------------------------------------------------------------------------------------------------------------------------------------------------------------------------------------------------------------------|----------|
|      |                        |                                      |           |          |                                                                                             |               |                    | FIR 14.8– 173.2%<br>ARIMA 140.4–191.7%<br>BAR<br>Random forest 16.5–46.7%<br>ANN-FFNN 22.3–98.8%<br>FIR 13.9–123.6%<br>ARIMA 89.2–131.3%<br>CLASS<br>Random forest 18.2–<br>26.2%<br>ANN-FFNN 21.6–39.9%<br>FIR 4.5–10.4%<br>ARIMA 19.8–21.2% |          |
| [66] | Energy management      | Institutional (University buildings) | Real data | Blackbox | ANN-NAR<br>ANN-NARX<br>ANN-ENN                                                              | 1 hr          | Energy consumption | ANN-NAR 0.002953–<br>0.12060<br>ANN-NARX 0.003324–<br>0.011442<br>ANN-ENN 0.001376–<br>0.007585                                                                                                                                               | MSE      |
| [67] | Energy management      | Institutional (University buildings) | Real data | Blackbox | ANN(NAR)<br>ANN(NARX)                                                                       | 1 hr          | Energy consumption | ANN-NAR 1.26<br>ANN-NARX 1.10                                                                                                                                                                                                                 | MSE      |
| [68] | Demand side management | Residential (Houses)                 | Real data | Blackbox | Persistence<br>AR<br>ANN-WT<br>LS-based ST<br>ANN-based ST<br>NM-AR<br>WT-NM-AR<br>Proposed | 6 hr<br>24 hr | Electricity load   | 6 h 24 hr<br>Persistence 18.83–19.21<br>21.93–22.85<br>AR 15.50–18.64 18.01–<br>19.42<br>ANN-WT 13.22–16.46<br>16.41–17.65<br>LS 12.55–16.06 15.51–17.21<br>ANN 12.31–15.83 15.11–<br>17.10                                                   | RMSE (%) |

|      |                                            |                               |                        |          |                                                                                                                                           |                                 |                                                  |                                                                                                                                                                                                                                                                                                                                        |                |
|------|--------------------------------------------|-------------------------------|------------------------|----------|-------------------------------------------------------------------------------------------------------------------------------------------|---------------------------------|--------------------------------------------------|----------------------------------------------------------------------------------------------------------------------------------------------------------------------------------------------------------------------------------------------------------------------------------------------------------------------------------------|----------------|
|      |                                            |                               |                        |          |                                                                                                                                           |                                 |                                                  | NM-AR 12.04–14.99<br>13.72–16.17<br>WT-NM 1.91–13.93 13.11–<br>14.41<br>Proposed 11.88–13.58<br>12.92–14.06                                                                                                                                                                                                                            |                |
| [69] | Model predictive controllers               | Commercial (Office)           | Simulated (EnergyPlus) | Blackbox | ANN-FFNN                                                                                                                                  | 1 hr                            | Temperature Radiant temperature Electrical power | Heating Cooling Temp 0.902–0.953 0.819–0.936<br>Temp rad 0.856–0.940 0.865–0.893<br>Elect 0.828–0.952 0.864–0.962                                                                                                                                                                                                                      | R <sup>2</sup> |
| [70] | Demand side management and demand response | Commercial (Office buildings) | Real data              | Blackbox | ARIMA<br>SVM<br>ANN-BPNN<br>ANN-RBFNN<br>ANN-GRNN<br>FA<br>WT+BPNN<br>WT+RBFNN<br>WT+GRNN<br>WT+FA<br>WT+FF+FA<br>WT+MI-MI+NN<br>Proposed | 1hr<br>24hr<br>2 days<br>1 week | Overall building energy consumption              | 1 hr 2 days<br>ARIMA 4.26–21.83%<br>22.65%<br>SVM 11.87–34.21%<br>22.02%<br>ANN-BPNN 9.48–27.8%<br>21.1%<br>ANN-RBFNN 8.4–14.05%<br>17.01%<br>ANN-GRNN N/S 13.21%<br>FA N/S 11.23%<br>WT+BPNN 7.43–12.42%<br>9.34%<br>WT+RBFNN 6.32–9.54%<br>8.22%<br>WT+GRNN N/S 8.03%<br>WT+FA N/S 7.25%<br>WT+FF+FA N/S 6.98%<br>WT+ +NN 4.59–8.94% | MAPE (%)       |

|      |                                      |                                |           |                 |                                                                                                 |               |                                                                            |                                                                                                                                                                                                   |          |
|------|--------------------------------------|--------------------------------|-----------|-----------------|-------------------------------------------------------------------------------------------------|---------------|----------------------------------------------------------------------------|---------------------------------------------------------------------------------------------------------------------------------------------------------------------------------------------------|----------|
|      |                                      |                                |           |                 |                                                                                                 |               |                                                                            | 6.02%                                                                                                                                                                                             |          |
|      |                                      |                                |           |                 |                                                                                                 |               |                                                                            | Proposed 2.14–3.95%                                                                                                                                                                               |          |
|      |                                      |                                |           |                 |                                                                                                 |               |                                                                            | 2.14%                                                                                                                                                                                             |          |
| [71] | N/s                                  | Residential (Houses)           | Real data | Hybrid-grey     | Hybrid ANN-MLP<br>SVR<br>LSSVM<br>GMM<br>GPR                                                    | 1 hr<br>24 hr | Total building consumption<br>,<br>Non-AC building electricity consumption | 1 hr 24 hr<br>Hybrid 11.2–26.2% 11.3–29.2%<br>ANN-MLP 12.5–28.2% 12.6–34.4%<br>SVR 12.8–27.3% 12.4–31.9%<br>LSSVM 13.2–28.7% 11.8–31.4%<br>GMM 19.5–31.9% 20.2–37.8%<br>GPR 21.4–32.3% 22.7–39.3% | CV%      |
| [72] | HVAC optimization                    | Commercial (Air handling unit) | Real data | Hybrid-ensemble | ANN-E-MLP                                                                                       | 30 min        | Energy consumption<br>, Room temperature                                   | Energy consumption-0.067<br>Room temperature-0.004                                                                                                                                                | MAPE     |
| [73] | Power systems operation and planning | Sectors                        | Real data | Blackbox        | x2 Moving average<br>x1 expo smoothing<br>x2 expo smoothing<br>ARMA<br>ANN-BPNN<br>GMHD network | Monthly       | Sector energy consumption                                                  | Double moving avg 1.82–6.14%<br>x1 expo smoothing 1.59–6.2%<br>x2 expo. Smoothing 1.61–5.3%<br>ARMA 1.86–3.9%<br>ANN-BPNN 1.34–3.86%<br>GMHD network 0.83–2.69%                                   | MAPE (%) |
| [74] | District energy management           | Residential (District)         | Real data | Blackbox        | ANN-D-MLP                                                                                       | 30 mins       | Overall building                                                           | 0.995–0.999                                                                                                                                                                                       | R        |

|      |                            |                                    |                        |                      |                                                        |        |                                                                |                                                                                                                                                                         |                |
|------|----------------------------|------------------------------------|------------------------|----------------------|--------------------------------------------------------|--------|----------------------------------------------------------------|-------------------------------------------------------------------------------------------------------------------------------------------------------------------------|----------------|
|      |                            |                                    |                        |                      |                                                        |        | electricity consumption                                        |                                                                                                                                                                         |                |
| [75] | N/s                        | State (Industrial sector)          | Real data              | Blackbox             | ANN-D-MPL Regression                                   | 1 year | Industrial electricity consumption                             | ANN-D-MLP 0.0099<br>Regression 0.0750                                                                                                                                   | MAPE           |
| [76] | N/s                        | Institutional (Chiller-university) | Real data              | Blackbox             | Kernel Regression<br>ANN-Dynamic SVR<br>MP Regression  | 24hrs  | Chiller electric power consumption                             | Kernel Regression 4.9%<br>ANN-Dynamic 3.8–6.6%<br>SVR 4.6–4.8%<br>MP Regression 2.9–4.0%                                                                                | CV%            |
| [77] | Demand side management     | Commercial (Office building)       | Simulated (EnergyPlus) | Blackbox Hybrid-grey | Resistor-Capacitor ANN-D-N/s SVR N4SID                 | 6 hr   | Building cooling energy                                        | R/C 0.81 – 0.87<br>ANN-D-N/s 0.57 – 0.93<br>SVR 0.69 – 0.73<br>N4SID 0.44 – 0.89<br>SID 0.86 – 0.96                                                                     | R <sup>2</sup> |
| [78] | Demand side management     | Institutional (Building)           | Real data              | Blackbox             | MLR<br>ANN-FFNN<br>ANN-NARX<br>Regression Tress<br>SVR | 1 day  | Building electricity consumption<br>,<br>Peak electricity load | Day ahead Peak<br>MLR 3.49–7.71 5.27–11.28%<br>ANN-FFNN 2.31–4.64 0.95–8.19%<br>ANN-NARX 1.04–2.31 1.01–9.74%<br>RTrees 2.31–8.60 3.23–9.3%<br>SVR 3.69–5.55 4.19–9.53% | MAPE (%)       |
| [35] | Emission estimation models | Commercial (Center)                | Simulated (EnergyPlus) | Blackbox             | ANN-FFNN<br>NARX<br>GPR<br>Ridge regression<br>MLR     | Annual | Building gas load                                              | ANN-FFNN 17–40%<br>GPR 18–39%<br>NARX 20–61%<br>Ridge 22–61%<br>MVR 21–69%                                                                                              | Relative error |
| [79] | Supply side management     | Commercial (Office)                | Real data              | Blackbox             | ANN-FFNN                                               | 1 hr   | Cooling demand,                                                | Cooling demand 8.2%<br>Air temperature 7.12%<br>Relative humidity 9.00%                                                                                                 | Relative error |



|      |                                      |                              |           |                             |                                    |              | Air temperature, Relative humidity |                                                                                                                                                                                                                   |                |
|------|--------------------------------------|------------------------------|-----------|-----------------------------|------------------------------------|--------------|------------------------------------|-------------------------------------------------------------------------------------------------------------------------------------------------------------------------------------------------------------------|----------------|
| [80] | Demand side management               | Institutional (University)   | Real data | Blackbox                    | ANN-FFNN<br>ANFIS                  | Daily        | Cooling load                       | ANN-FFNN 0.9700–0.9804<br>ANFIS 0.9696–0.9763                                                                                                                                                                     | R <sup>2</sup> |
| [81] | Power systems operation and planning | Sector (Residential)         | Real data | Blackbox                    | SVR-PSO<br>ANN-MLP<br>ARIMA<br>MLR | Monthly      | Electricity demand                 | SVR-PSO 2.13%<br>ANN-MLP 9.92%<br>ARIMA 4.71%<br>MLR 7.15%                                                                                                                                                        | MAPE (%)       |
| [82] | Demand side management               | N/s                          | Real data | Blackbox<br>Hybrid-ensemble | ARIMA<br>ANN-MLP<br>ANN-E-MLP      | Day          | Cooling load                       | ARIMA 9.17%<br>ANN-MLP 3.45–7.88%<br>ANN-E-MLP 3.65%                                                                                                                                                              | MRE            |
| [83] | Demand side management               | Commercial (Office building) | Real data | Blackbox                    | Linear<br>ANN-FFNN<br>ANN-D-FFNN   | 1 hr         | Heating load<br>Cooling load       | Heating Cooling<br>Linear 0.61–0.62 0.09–0.29<br>ANN-FFNN 0.63–0.79<br>0.30–0.88<br>ANN-D-FFNN 0.63–0.80<br>0.27–0.91                                                                                             | R <sup>2</sup> |
| [84] | Demand side management               | Institutional (N/s)          | Real data | Blackbox                    | ANN-FFNN<br>CBR                    | 1 hr to 6 hr | Electricity consumption            | ANN-FFNN<br>1 2 3 4 5 6<br>All 8.38 8.09 8.01 7.94<br>8.05 7.95%<br>PCA 8.48 7.97 7.91 7.51<br>7.56 7.30%<br>CBR<br>1 2 3 4 5 6<br>All 14.3 13.8 13.7 13.7 13.6<br>13.5%<br>PCA 13.4 13.1 13.3 13.5<br>13.6 13.6% | CV (RMSE)      |

|      |                               |                                |           |                          |                                                                      |                               |                             |                                                                                                                                                                                                                   |                |
|------|-------------------------------|--------------------------------|-----------|--------------------------|----------------------------------------------------------------------|-------------------------------|-----------------------------|-------------------------------------------------------------------------------------------------------------------------------------------------------------------------------------------------------------------|----------------|
| [85] | Energy efficiency improvement | Residential (District heating) | Real data | Blackbox Hybrid Ensemble | LR<br>ETR<br>ANN-D-FFNN<br>SVM<br>Ensemble -HT                       | 1 day                         | Thermal load                | Static Dynamic (24 hr)<br>LR 17.34% 17.27%<br>ETR 12.34% 12.42%<br>SVM 14.54% 14.72%<br>ANN 11.92% 11.56%<br>Expert 12.06% 11.95%                                                                                 | MAPE (%)       |
| [86] | Model Predictive Controllers  | Residential                    | Simulated | Blackbox                 | ANN-WNARx<br>ANN-NARX                                                | 24 hrs                        | Heating demand              | ANN-WNARX 99.8<br>ANN-NARX 95.10                                                                                                                                                                                  | R <sup>2</sup> |
| [87] | Demand side management        | Institutional (School)         | Real data | Blackbox                 | ANN-NARN                                                             | 1 month<br>3 month<br>6 month | Electric energy consumption | 1 month: 0.89–0.97<br>3 month: 0.88–0.96<br>6 month: 0.84–0.96                                                                                                                                                    | R <sup>2</sup> |
| [88] | Demand side management        | Commercial (Office)            | Real data | Blackbox                 | Tree bagger<br>GPR<br>MLR<br>Bagged tree<br>Boosted tree<br>ANN-BPNN | 7 days<br>14 days<br>1 month  | Electric power demand       | 7 day 14 day 1 month<br>GPR 20.51% 25.71%<br>35.36%<br>MLR 14.14% 18.01%<br>23.01%<br>TB 19.00% 23.57% 32.63%<br>Boosted 20.35% 24.74%<br>32.01%<br>Bagged 19.38% 23.94%<br>32.77%<br>ANN 20.31% 25.45%<br>33.64% | CV%            |
| [89] | N/s                           | Commercial (N/s)               | Real data | Blackbox                 | ANN<br>EP-ANN<br>GA-ANN<br>ACO-ANN                                   | 1 hr                          | Cooling load                | ANN 3.44%<br>EP-ANN 3.21%<br>GA-ANN 3.15%<br>ACO-ANN 2.99%                                                                                                                                                        | MAPE (%)       |

|      |                                    |                                   |                        |                          |                                 |                            |                                                            |                                                                                                                               |                |
|------|------------------------------------|-----------------------------------|------------------------|--------------------------|---------------------------------|----------------------------|------------------------------------------------------------|-------------------------------------------------------------------------------------------------------------------------------|----------------|
|      |                                    |                                   |                        |                          | PSO-ANN<br>W-ANN<br>DEA-ANN     |                            |                                                            | PSO-ANN 2.73%<br>W-ANN 2.57%<br>DEA-ANN 2.39%<br>Pro-ANN 2.29%                                                                |                |
| [90] | Operations and control             | District                          | Real data              | Blackbox                 | ANN-FFNN<br>ANN-Recurrent       | 24 hr                      | Heating load                                               | ANN-FFNN 15.28 <sup>2</sup> GJ <sup>2</sup><br>ANN-Recurrent 11.33 <sup>2</sup> GJ <sup>2</sup>                               | MSE            |
| [91] | Supply side management             | Institutional (University campus) | Real data              | Blackbox                 | ANN-SRWNN<br>ANN-WNN<br>ANN-MLP | 24 hr                      | Electricity demand                                         | ANN-SRWNN 3.47%<br>ANN- WNN 4.26%<br>ANN-MLP 6.54%                                                                            | nMAE           |
| [37] | Demand side management             | Commercial (Office)               | Simulated (TRNSYS)     | Blackbox Hybrid-ensemble | ANN-FFDD<br>ANN-E-FFNN          | 1 hr                       | Cooling load                                               | ANN-FFNN-Model A-0.9308<br>ANN-FFNN-Model B-0.9287<br>ANN-E-FFNN-0.9596                                                       | R <sup>2</sup> |
| [92] | Demand side management             | Commercial (Office)               | Real data              | Blackbox                 | ANN-NARX<br>SVR<br>ARIMA<br>LR  | 1 day<br>1 week<br>1 month | Power demand                                               | 1 day 1 week 1 month<br>NARX 8–9% 9–12% 11–15%<br>SVR 7–8% 9–10% 10–14%<br>ARIMA 22–27% N/A<br>N/A<br>LR 11–13% 12–15% 15–17% | MAPE (%)       |
| [93] | Demand response                    | Commercial (Office)               | Real data              | Blackbox                 | ANN-FFNN<br>Linear Regression   | 1 min                      | Electric power demand                                      | ANN-FFNN 3.92 – 9,705%<br>LR 6.48–11,118%                                                                                     | MAPE (%)       |
| [94] | Event detection/Control strategies | Commercial (Office)               | Simulated (EnergyPlus) | Blackbox                 | XGBoost<br>ANN-FFNN<br>DDR      | 1 hr                       | Cooling electricity consumption<br>Heating gas consumption | Cooling Heating<br>XGBoost 0.95–0.99 0.88–0.96<br>ANN-FFNN 0.6–0.95<br>0.57–0.87<br>DDR 0.85 0.67                             | R <sup>2</sup> |

|       |                                       |                                                                |           |                             |                                                             |                                       |                                        |                                                                                                                             |                |
|-------|---------------------------------------|----------------------------------------------------------------|-----------|-----------------------------|-------------------------------------------------------------|---------------------------------------|----------------------------------------|-----------------------------------------------------------------------------------------------------------------------------|----------------|
| [95]  | National energy residential buildings | Sector (Residential)                                           | Real data | Blackbox                    | ANN-FFNN<br>MLR                                             | Annual                                | Sector energy consumption              | ANN-FFNN 0.989229–0.98957<br>MLR 0.95697–0.97168                                                                            | R <sup>2</sup> |
| [96]  | Supply side management                | Residential (N/s)                                              | Real data | Blackbox                    | ANN-D-CNN<br>ANN-D-LST<br>ANN-RBM<br>SVM<br>ANN-FFNN        | 60 hr                                 | Electricity demand                     | ANN-D-CNN 0.677 kW<br>ANN-D-LST 0.625 kW<br>ANN-RBM 0.663 kW<br>SVM 0.814 kW<br>ANN-FFNN 0.691 kW                           | RMSE (kW)      |
| [97]  | Demand side management                | Institutional (Education building)                             | Real data | Blackbox                    | MLR<br>ELN<br>Random forest<br>GBM<br>SVR<br>XGB<br>ANN-DNN | 24 hr                                 | Cooling load                           | MLR 36.2–58%<br>ELN 28.0–52.1%<br>RF 21.9–52.8%<br>GBM 19.7–29.8%<br>SVR 19–32.9%<br>XGB 19.5–38%<br>DNN 21.6–29.3%         | CV (RMSE)      |
| [98]  | Demand side management                | Commercial (Office building)                                   | Real data | Blackbox<br>Hybrid-ensemble | Simple<br>ANN-FFNN<br>SVM<br>ANN-D-BN                       | 1 hr to 6 hr                          | Cooling load                           | Simple 31.21–37.86%<br>ANN-FFNN 29.77–35.43%<br>SVM 26.38–31.4%<br>ANN-D-BN 21.38–27.88%                                    | MAPE           |
| [99]  | Supply side management                | Residential (N/s)                                              | Real data | Blackbox                    | ANN<br>SVM<br>ANN-NARNET<br>ANN-D-CRBM<br>ANN-D-FCRBM       | 15 min, 1 hour, 1 day, 1 week, 1 year | Electricity demand overall, sub meters | ANN 0.246–2.53 kW<br>SVM 0.188–1.99 kW<br>ANN-NARNET 0.457–2.81 kW<br>ANN-D-CRBM 0.18–1.07 kW<br>ANN-D-FCRBM 0.170–0.899 kW | RMSE (kW)      |
| [100] | Supply side management                | Institutional (Public safety building)<br>Residential (Houses) | Real data | Blackbox                    | ANN-MLP<br>ANN-D-RNN                                        | 1 week, 1 year                        | Overall electricity consumption        | Commercial (horizon 1 week)<br>D-RNN: Model A 9.33–47.2%<br>D-RNN: Model B 8.73–                                            | RMSE           |

|       |                        |               |           |                         |                                                              |                |                                                           |                                                                                                                                                                                                                |           |
|-------|------------------------|---------------|-----------|-------------------------|--------------------------------------------------------------|----------------|-----------------------------------------------------------|----------------------------------------------------------------------------------------------------------------------------------------------------------------------------------------------------------------|-----------|
|       |                        |               |           |                         |                                                              |                |                                                           | 6.8%<br>MLP 10.02–84.4%<br>Residential (horizon 1-year)<br>D-RNN: 15–39%<br>MLP 14–31%                                                                                                                         |           |
| [101] | Operations and control | Institutional | Real data | Hybrid-ensemble         | ANN-E-FFNN                                                   | 1 hr           | AHU energy<br>Room Humidity<br>Room temp                  | AHU energy 0.365<br>Room air humidity 0.02196<br>Room air temperature 0.0056                                                                                                                                   | MAPE      |
| [102] | N/s                    | Residential   | Real data | Blackbox<br>Hybrid-grey | ANN-FFNN-R/C<br>SVM-R/C<br>GMM-R/C<br>ANN-FFNN<br>SVM<br>GMM | 1 hr<br>1 day  | Non-AC electric power consumption<br>AC power consumption | 1 hr 24 hr<br>FFNN-R/C 8.6–22.8%<br>10.7–28.6%<br>SVM-R/C 8.2–21.5% 10.0–27.5%<br>GMM-R/C 12.5–27.2%<br>14.7–32.2%<br>ANN-FFNN 9.3–23.9%<br>11.9–30.2%<br>SVM 9.1–23.4% 10.4–28.9%<br>GMM 4.3–28.4% 17.8–34.0% | MAPE      |
| [103] | N/s                    | Residential   | Real data | Blackbox                | ANN-FFNN<br>SVR<br>Gaussian Process Regression               | 1 hr<br>24 hrs | Electric demand, consumption                              | peak 1 hr 24hr<br>MLP 2.3–6.3% 6.6–14.5%<br>17–28%<br>SVR 2.3–5.7% 6.1–13.2%<br>9–21%<br>GPR 2.3–6.4% 7.8–18.0%<br>14–28%                                                                                      | CV (RMSE) |

|       |                                              |                                  |           |                 |                                              |         |                                                                                                                                                    |                                                                                                                                                                     |      |
|-------|----------------------------------------------|----------------------------------|-----------|-----------------|----------------------------------------------|---------|----------------------------------------------------------------------------------------------------------------------------------------------------|---------------------------------------------------------------------------------------------------------------------------------------------------------------------|------|
| [104] | Optimal operation and demand side management | Commercial (Office)              | N/s       | Blackbox        | ARIMA<br>LR<br>GM<br>ANN<br>Ensemble (Above) | Day     | Cooling load                                                                                                                                       | N/s                                                                                                                                                                 | N/s  |
| [105] | HVAC control                                 | Institutional (Resource station) | Simulated | Hybrid-ensemble | ANN-E-FFNN                                   | 1 hr    | HVAC energy consumption ,<br>Indoor temperature                                                                                                    | Energy consumption 10%<br>Indoor temperature 0.3%                                                                                                                   | MAPE |
| [106] | HVAC control and optimization                | Institutional (Resource station) | Real data | Hybrid-ensemble | ANN-E-FFNN                                   | 15 mins | Chiller energy<br>Supply fan energy<br>Return fan energy<br>Pump energy<br>Supply air temperature<br>Supply air static pressure<br>Static pressure | Chiller energy 0.059<br>Supply fan energy 0.017<br>Return fan energy 0.011<br>Pump energy 0.001<br>Supply air temperature 0.001<br>Supply air static pressure 0.005 | MAPE |
| [107] | Optimization and control                     | Commercial Wastewater treatment  | Real data | Blackbox        | ANN-MLP                                      | 15 mins | Pump energy consumption<br>Pump output flow rate                                                                                                   | Energy consumption 0.01–0.09%<br>Output flow rate 0.01–0.07%                                                                                                        | MAPE |
| [108] | Optimization and control                     | Institutional (University)       | Real data | Blackbox        | ANN-MLP                                      | 15 mins | Energy consumption ,                                                                                                                               | Energy 4.59–5.19%<br>Room temperature: 0.1–0.24%                                                                                                                    | MAPE |

|       |                          |                                 |           |          |                                                      |                    |                                                               |                                                                                                                                                |      |
|-------|--------------------------|---------------------------------|-----------|----------|------------------------------------------------------|--------------------|---------------------------------------------------------------|------------------------------------------------------------------------------------------------------------------------------------------------|------|
|       |                          |                                 |           |          |                                                      |                    | Room temperature                                              |                                                                                                                                                |      |
| [109] | Optimization and control | Institutional (Research center) | Real data | Blackbox | ANN-FFNN                                             | 30 mins            | HVAC consumption<br>Indoor air temperature<br>Indoor humidity | HVAC energy 0.1069%<br>Temperature 0.0075–0.0083%<br>Humidity 0.1034–0.1116%                                                                   | MAPE |
| [110] | Optimization and control | Component (VAV)                 | Real data | Blackbox | ANN-FFNN<br>RF<br>SVM<br>Boosting<br>Pace Regression | 1-8mins            | Reheat energy<br>Room humidity<br>Room temperature            | Reheat Temp RH MLP 58.2–64.5 0.22–0.36 0.22–0.37<br>RF 66.44 0.53 0.39<br>SVM 64.13 0.46 0.08<br>Boost 66.39 0.54 0.72<br>PR 68.75 0.61 0.55   | MAE  |
| [111] | Energy modeling          | Institutional (University)      | Real data | Blackbox | Regression<br>ANN-FFNN<br>EnergyPlus                 | Daily 24 hrs       | Chilled water<br>Steam                                        | CW 24 hrs daily 24 hrs daily<br>Regress 27% 18% 27% 16%<br>FFNN 25% 18% 14% 8%<br>EPlus 33% 24% 23% 17                                         | CV%  |
| [112] | Demand side management   | Commercial                      | Real data | Blackbox | ANN-D-ELM<br>ANN-FFNN<br>SVR<br>ANN-RBNN<br>MLR      | 30 mins<br>60 mins | Energy Consumption                                            | 30min 60 min<br>ANN-D-ELM 2.917%<br>3.642%<br>ANN-FFNN 4.179%<br>6.392%<br>SVR 3.692% 5.101%<br>ANN-RBNN 3.893%<br>4.211%<br>MLR 5.465% 5.956% | MRE  |
| [113] | Optimization and control | Institutional                   | Simulated | Blackbox | ANN-FFNN                                             | 12 hrs             | Heating load                                                  | Heating load 5.03–7.4%<br>Internal air temperature                                                                                             | MAPE |

|       |                            |                            |                        |          |                                               |         |                                                        |                                                                                                                                                    |           |
|-------|----------------------------|----------------------------|------------------------|----------|-----------------------------------------------|---------|--------------------------------------------------------|----------------------------------------------------------------------------------------------------------------------------------------------------|-----------|
|       |                            |                            | (Matlab)               |          |                                               |         | Internal air temperature<br>PMV                        | 0.7–1.6%<br>PMV 6.2–16.5%                                                                                                                          |           |
| [114] | Demand response            | Institutional (University) | Simulated (EnergyPlus) | Blackbox | ANN-E-FFNN<br>SVM                             | 24 hrs  | Electric power demand<br>Cooling electric power demand | Electrical Cooling<br>ANN 0.267–0.272% 0.123–0.146%<br>SVM 0.316–0.318% 0.068–0.100%                                                               | CV (RMSE) |
| [115] | Optimization and control   | Commercial                 | Simulated (EnergyPlus) | Blackbox | ANN-FFNN                                      | 1 hr    | Electric consumption                                   | 0.0109–0.68                                                                                                                                        | CV        |
| [116] | District energy management | District                   | Real data              | Blackbox | ANN-NARX<br>ANN-D-NARX<br>SVM-RBF<br>SVM-Poly | Monthly | Heating load<br>Cooling load                           | Heating Cooling<br>NARX 3.8–3.9 kWh 2.3–2.4 kWh<br>D-NARX 3.8–4.1 kWh 2.4–2.8 kWh<br>RBF 9.5–16.4 kWh 7.8–15 kWh<br>Poly 8.9–13.0 kWh 5.8–13.9 kWh | MAE       |
| [117] | District energy management | District                   | Real data              | Blackbox | DEEP-RNN<br>ANN-FFNN                          | 24 hr   | Heating load                                           | DEEP-RNN MLP<br>Engineering build. 0.271 0.278<br>Science hall 0.355 0.552<br>Marriot 0.347 0.439<br>Emery building 0.300 0.353                    | CV        |



|       |                                     |                              |                        |          |                                                               |                     |                            |                                                                                                                                                                                                     |                |
|-------|-------------------------------------|------------------------------|------------------------|----------|---------------------------------------------------------------|---------------------|----------------------------|-----------------------------------------------------------------------------------------------------------------------------------------------------------------------------------------------------|----------------|
| [119] | District energy management          | District                     | Simulated (EnergyPlus) | Blackbox | ANN-D-FFNN                                                    | 24 hr               | Energy consumption PV      | Energy consumption<br>0.9661<br>PV 0.9412                                                                                                                                                           | R <sup>2</sup> |
| [118] | District energy management          | District                     | Real data              | Blackbox | Linear regression<br>Kernel machine<br>ANN-D-Recur<br>2-nodes | 1 hr<br>24 hr       | Natural gas consumption    | 1 hr 24 hr<br>Linear regression 8.1%<br>6.1%<br>Kernel machine 14% 9.7%<br>ANN-D-Recurrent 9.3%<br>.8%<br>2-node 9.8% 11.2%<br>2-node linear mem 15.4%<br>0.5%<br>2-node non lin mem<br>15.85% 8.6% | MAPE           |
| [120] | Load management                     | Commercial (Office)          | Real data              | Blackbox | MLR<br>GPR<br>ANN-FFNN                                        | 7-day<br>1<br>month | Cooling load               | 7-day 1 month<br>MLR 8.34% 68.22%<br>GPR 2.05% 59.15%<br>ANN-FFNN 2.03%<br>51.63%                                                                                                                   | CV%            |
| [121] | Demand response / Demand management | Commercial and institutional | Real data              | Blackbox | SARIMAX<br>ANN-D-CNN<br>ANN-D-RNN                             | 1 hr<br>24 hr       | Electricity demand         | 1 hr 24 hr<br>SARIMAX 3.4–22.1% 5.2–<br>21 kW<br>ANN-D-RNN 2.9–12.2%<br>4.7–45 kW<br>ANN-D-CNN 2.7–10.9%<br>3.4–19 kW                                                                               | CV%<br>RMSE    |
| [122] | Demand / grid supply management     | Institutional (University)   | Real data              | Blackbox | ANN-FFNN                                                      | 9 day               | Electric load<br>Peak load | 4.7–8.4%                                                                                                                                                                                            | MAPE           |

|       |                                                     |                                            |           |                          |                                                                                 |                   |                                 |                                                                                                                                                                                                                                                                                                                                                                 |           |
|-------|-----------------------------------------------------|--------------------------------------------|-----------|--------------------------|---------------------------------------------------------------------------------|-------------------|---------------------------------|-----------------------------------------------------------------------------------------------------------------------------------------------------------------------------------------------------------------------------------------------------------------------------------------------------------------------------------------------------------------|-----------|
| [123] | N/s                                                 | Institutional (University)                 | Real data | Blackbox                 | MLR<br>SVR<br>ANN-FFNN<br>XGB                                                   | 30 mins<br>24 hrs | Cooling load                    | MLR 26.4–34.3%<br>SVR 20.2–25.3%<br>ANN-FFNN 20.1–25.1%<br>XGB 17.7–19.3%                                                                                                                                                                                                                                                                                       | CV (RMSE) |
| [124] | Planning energy management                          | Residential (3 floor apartment)            | Real data | Blackbox Hybrid-ensemble | ANN<br>SVM<br>LR<br>C&R Tree<br>E-SVR+LR<br>E-ANN<br>E-S-M-LSSVR<br>E-S-P-LSSVR | 24 hrs            | Overall electricity consumption | ANN 36.83%<br>SVM 43.22%<br>LR 38.52%<br>C&R Tree 48.20%<br>E- SVR + LR 42.75%<br>E-ANN 42.31%<br>E-S-M-LSSVR15.66%<br>E-S-PSO-L-SSVR 16.19%                                                                                                                                                                                                                    | MAPE      |
| [125] | Energy management, equipment efficiency improvement | Commercial (Retail)<br>Commercial (Office) | Real data | Blackbox                 | ANN-BPNN<br>ELM<br>SVR                                                          | 30 mins<br>1 hr   | Overall energy consumption      | Retail BPNN ELM SVR<br>HMTD 7.14% 4.85%<br>9.18% Bootstrap 8.08%<br>5.04% 8.60%<br>Original 8.34% 5.45%<br>8.89%<br>GAN 0.94% 0.95% 0.94%<br>IDT 0.94% 0.95% 0.94%<br>Office BPNN ELM SVR<br>HMTD 16.46% 15.57%<br>21.57%<br>Bootstrap 17.15% 15.12%<br>1.47%<br>Original 19.10% 16.76%<br>21.78%<br>GAN 0.954% 0.952%<br>0.944%<br>IDT 0.952% 0.950%<br>0.943% | MAPE      |

|       |                        |                                 |           |                             |                                                                     |        |                                            |                                                                                                                                |                |
|-------|------------------------|---------------------------------|-----------|-----------------------------|---------------------------------------------------------------------|--------|--------------------------------------------|--------------------------------------------------------------------------------------------------------------------------------|----------------|
| [126] | Demand side management | Institutional (Government)      | Real data | Blackbox                    | ANN-FFNN                                                            | 24 hrs | Electricity<br>Natural gas<br>Cooling load | electricity 15.9–16.4%<br>natural gas 20.1–22.1%<br>cooling load 50.26–77.57%                                                  | MAPE           |
| [127] | N/s                    | Commercial (Shopping mall)      | Real data | Blackbox                    | SVR-chaos<br>SVR-WD<br>SVR<br>ANN-FFNN                              | 1 hr   | Cooling load                               | SVR-chaos 2.28%<br>SVR-WD 2.45%<br>SVR 3.96%<br>ANN-FFNN 3.97%                                                                 | CV (RMSE)      |
| [128] | Demand side management | Institutional (Research center) | Real data | Blackbox<br>Hybrid-ensemble | Naïve<br>SARIME<br>ANN-FFNN<br>ANN-E-FFNN<br>ANN-RBF<br>ANN-RBF-RNC | 24 hrs | Electricity load                           | Naïve 6.40–7.61 SARIME<br>2.17-5.52 ANN-FFNN<br>9.10-13.55 ANN-E-FFNN<br>2.40-2.95 ANN-RBF 2.14-4.36;<br>ANN-RBF-RNC 2.82-3.34 | MSE            |
| [129] | Energy conservation    | Commercial (Office)             | Real data | Blackbox                    | SVR ANN-FFNN                                                        | 1 hr   | Lighting usage                             | SVR 0.9273 ANN-FFNN 0.6980                                                                                                     | R <sup>2</sup> |
| [130] | Supply side management | Intutional (University)         | Real data | Blackbox                    | ANN-FFNN                                                            | 1 hr   | Electricity usage                          | 0.9943-0.9953                                                                                                                  | R              |
| [131] | Demand side response   | Residential (House)             | Real data | Blackbox                    | ANN-FFNN                                                            | 1 hr   | Electricity load                           | 0.034–0.111 kW                                                                                                                 | RMSE           |
